# Supplementary material
Source: PubMed Central journal article supplement (PMC10358074)

Online Resource 2

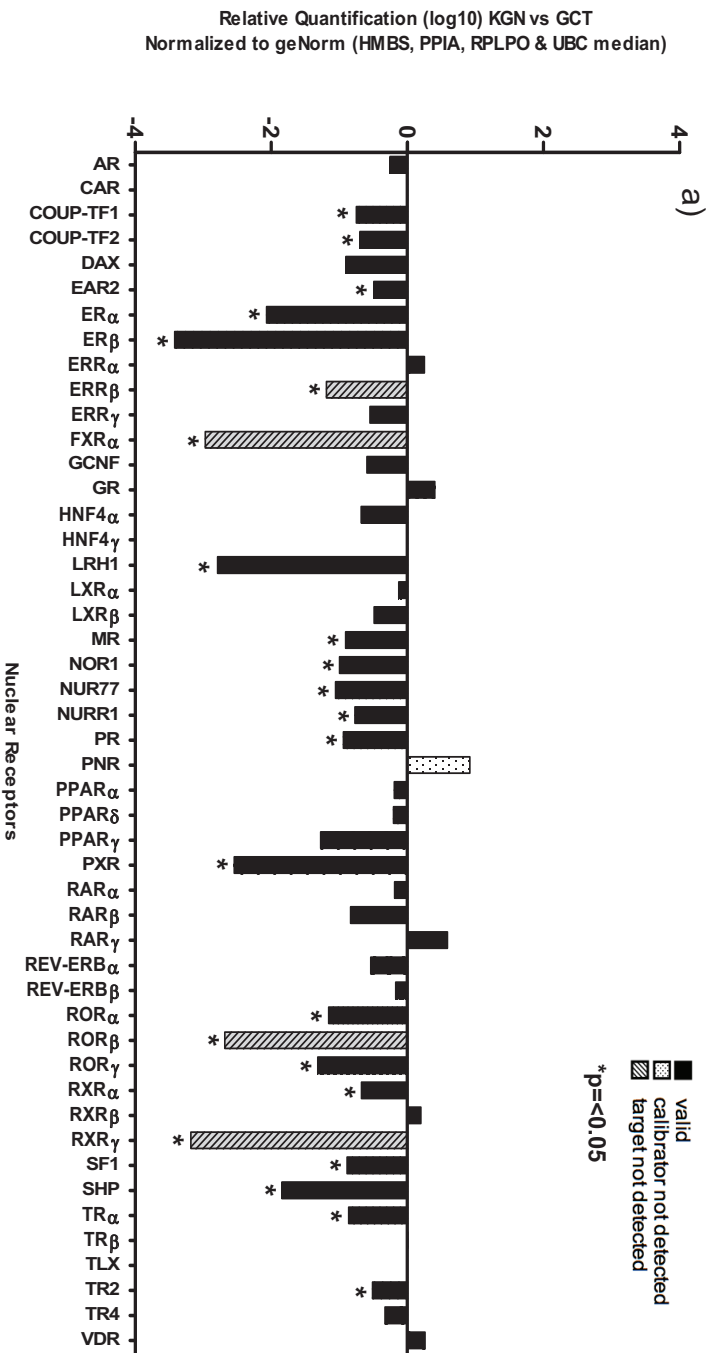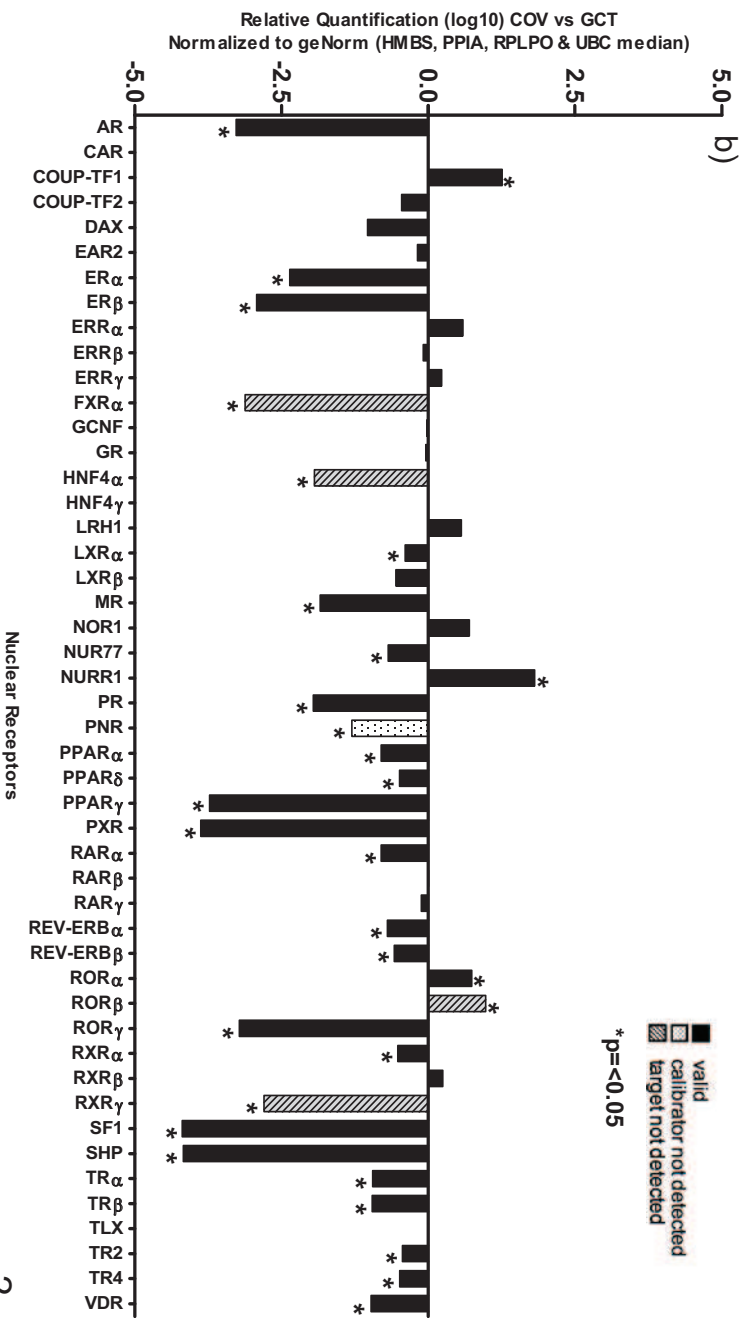

Supplement: 12672_2011_69_MOESM2_ESM.pdf [file 12672_2011_69_MOESM2_ESM.pdf]

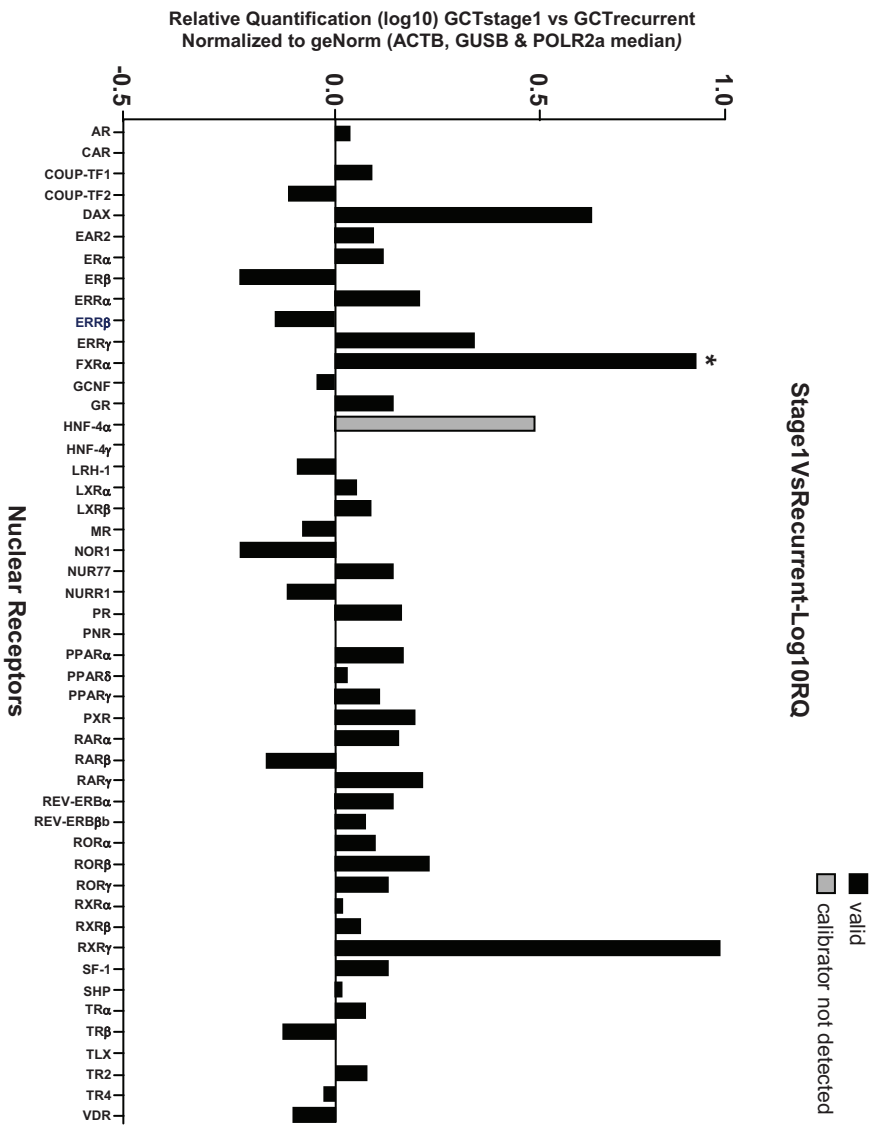

Supplement: 12672_2011_69_MOESM5_ESM.pdf [file 12672_2011_69_MOESM5_ESM.pdf]
